# Supplementary material
Source: Springer Nature journal article supplement (https://www.springermedizin.de/resource/supplementary/12885_2013_5277_MOESM1_ESM.pdf/9465636)
Supplement: MOESM1 [file 9465636]

Additional Table 1. Characteristics of the 458 primary breast tumors.

|                                              | Number of patients (%) | Number of distant relapses (%) | <i>P</i> -value <sup>a</sup> |
|----------------------------------------------|------------------------|--------------------------------|------------------------------|
| <i>Total</i>                                 | 458 (100.0)            | 170 (37.1)                     |                              |
| <i>Age</i>                                   |                        |                                |                              |
| ≤50                                          | 99 (21.6)              | 38 (38.4)                      | NS                           |
| >50                                          | 359 (78.4)             | 132 (36.8)                     |                              |
| <i>SBR histological grade</i> <sup>b,c</sup> |                        |                                |                              |
| I                                            | 58 (12.6)              | 8 (13.8)                       | <b>0.000079</b>              |
| II                                           | 230 (50.2)             | 84 (36.5)                      |                              |
| III                                          | 161 (35.2)             | 74 (46.0)                      |                              |
| <i>Lymph node status</i> <sup>d</sup>        |                        |                                |                              |
| 0                                            | 120 (26.2)             | 35 (29.2)                      | <b>0.00000064</b>            |
| 1-3                                          | 237 (51.7)             | 77 (32.5)                      |                              |
| >3                                           | 100 (21.8)             | 58 (58.0)                      |                              |
| <i>Macroscopic tumor size</i> <sup>e</sup>   |                        |                                |                              |
| ≤25mm                                        | 223 (48.7)             | 63 (28.3)                      | <b>0.00002</b>               |
| >25mm                                        | 227 (49.6)             | 106 (46.7)                     |                              |
| <i>ERα status</i>                            |                        |                                |                              |
| Negative                                     | 119 (26.0)             | 51 (42.9)                      | <b>0.0086</b>                |
| Positive                                     | 339 (74.0)             | 119 (35.1)                     |                              |
| <i>PR status</i>                             |                        |                                |                              |
| Negative                                     | 195 (42.6)             | 86 (44.1)                      | <b>0.0011</b>                |
| Positive                                     | 263 (57.4)             | 84 (31.9)                      |                              |
| <i>ERBB2 status</i>                          |                        |                                |                              |
| Negative                                     | 359 (78.4)             | 128 (35.7)                     | NS                           |
| Positive                                     | 99 (21.6)              | 42 (42.4)                      |                              |
| <i>Molecular subtypes</i>                    |                        |                                |                              |
| HR- ERBB2-                                   | 69 (15.1)              | 27 (39.1)                      | <b>0.0087</b>                |
| HR- ERBB2+                                   | 45 (9.8)               | 23 (51.1)                      |                              |
| HR+ ERBB2-                                   | 290 (63.3)             | 101 (34.8)                     |                              |
| HR+ ERBB2+                                   | 54 (11.8)              | 19 (35.2)                      |                              |

<sup>a</sup>Log-rank test. NS: not significant.

<sup>b</sup>Scarff-Bloom-Richardson classification.

<sup>c</sup>Information available for 449 patients.

<sup>d</sup>Information available for 457 patients.

<sup>e</sup>Information available for 450 patients.
